# Supplementary material for: 1T-Molybdenum disulfide/reduced graphene oxide hybrid fibers as high strength fibrous electrodes for wearable energy storage
Source: Royal Society of Chemistry journal article supplement (doi:10.1039/c8ta09328h), 2019-01-01
Supplement: c8ta09328h1.pdf [file c8ta09328h1.pdf]

## Supporting information

# 1T-Molybdenum disulfide/reduced graphene oxide hybrid fibers as high strength fibrous electrodes for wearable energy storage

Jiahui Li,<sup>a, c</sup> Yuanlong Shao,<sup>a, d</sup> Piaopiao Jiang,<sup>a</sup> Qinghong Zhang,<sup>b</sup> Chengyi Hou,<sup>\*a</sup> Yaogang Li,<sup>\*b</sup> and Hongzhi Wang<sup>a</sup>

<sup>a</sup> State Key Laboratory for Modification of Chemical Fibers and Polymer Materials, College of Materials Science and Engineering, Donghua University, Shanghai 201620, People's Republic of China.

<sup>b</sup> Engineering Research Center of Advanced Glasses Manufacturing Technology, Ministry of Education, Donghua University, Shanghai 201620, People's Republic of China.

<sup>c</sup> Yale University, Energy Sciences Institute II, 810 West Campus Drive, West Haven, CT 06516, USA.

<sup>d</sup> Cambridge Graphene Center, Department of Engineering, University of Cambridge, Cambridge, UK.

### Corresponding author:

Chenyi Hou [hcy@dhu.edu.cn](mailto:hcy@dhu.edu.cn)

Yaogang Li [yaogang\\_li@dhu.edu.cn](mailto:yaogang_li@dhu.edu.cn)

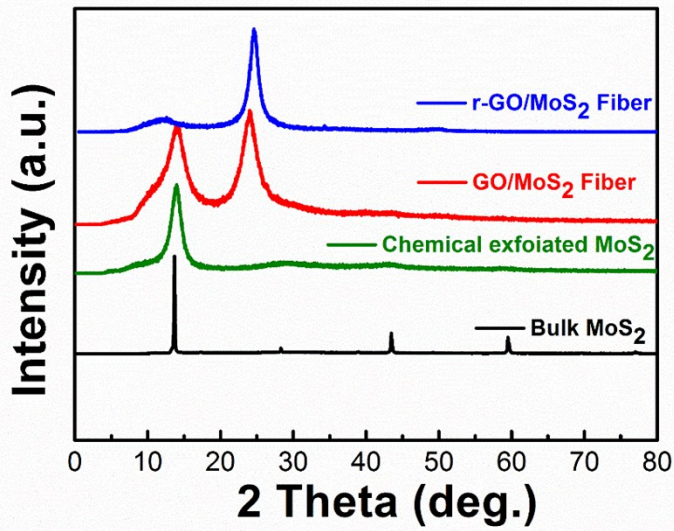

Figure S1. XRD patterns of bulk MoS<sub>2</sub> NSs (black), chemical exfoliated MoS<sub>2</sub> NSs (green), GMF (red) and rGM fiber (blue).

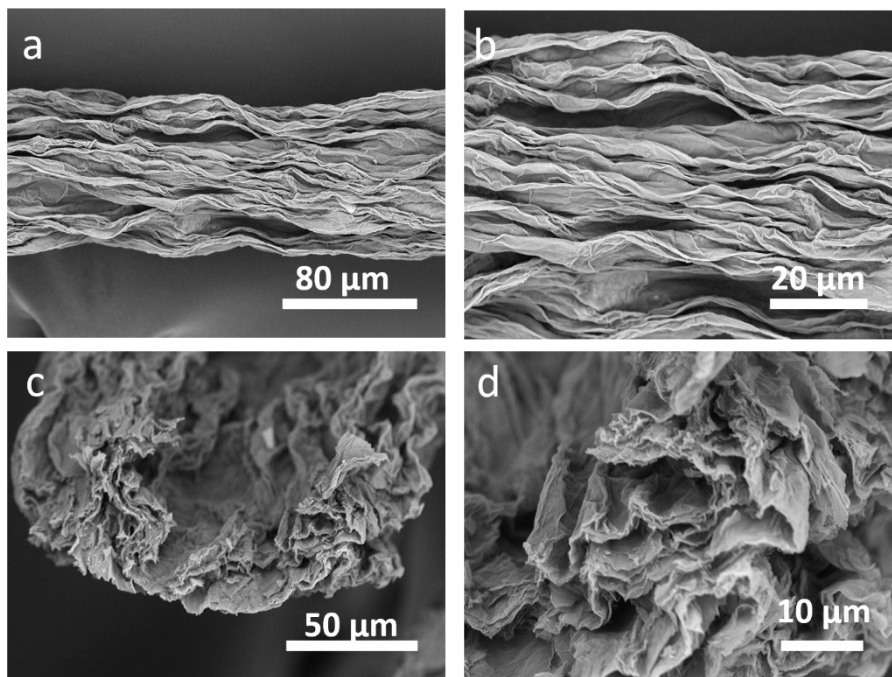

Figure S2. a-b) surface SEM and c-d) cross-section SEM images of the pure rGO fiber with different magnifications.

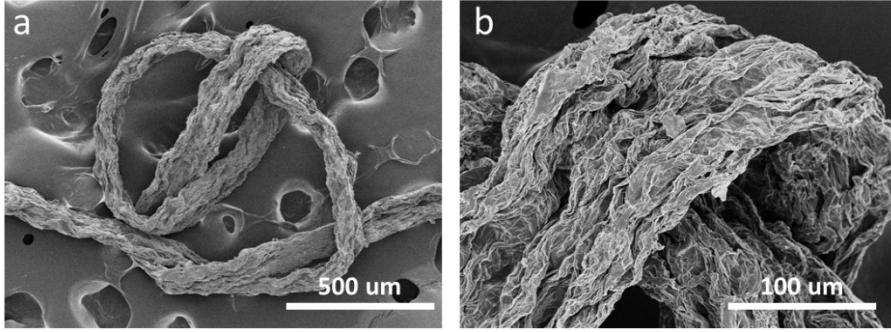

Figure S3. SEM images of rGM (40 wt% MoS<sub>2</sub>) in woven.

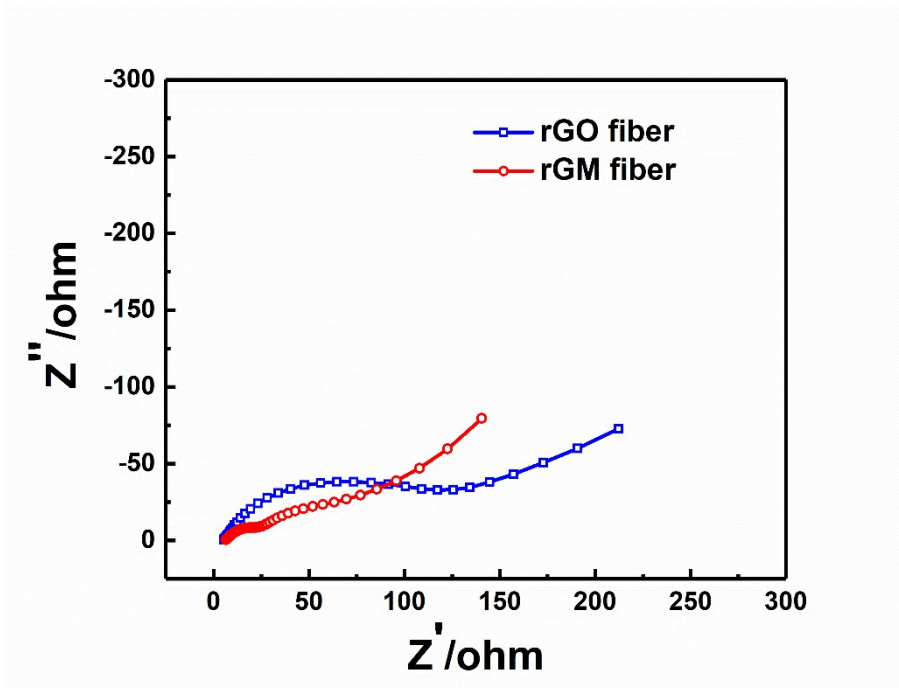

Figure S4. Nyquist plots of rGO and rGM fiber with a frequency loop from 100 kHz to 100 mHz and a perturbation amplitude of 5 mV at open circuit potential.

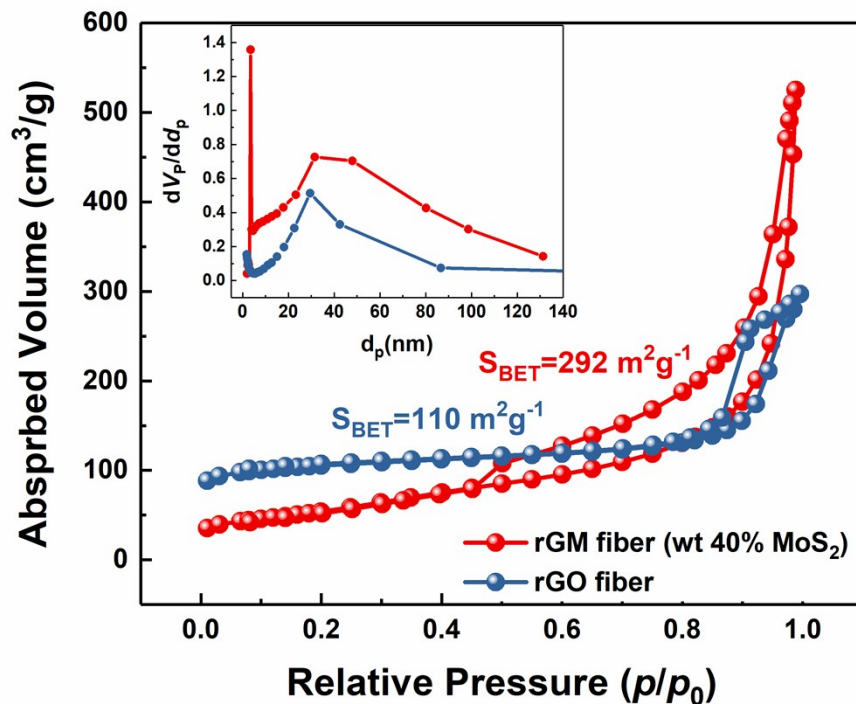

Figure S5. N<sub>2</sub> adsorption-desorption isotherms of the obtained rGO and rGM. The Brunauer-Emmett-Teller (BET) analysis shows that the specific surface area of rGO and rGM fiber up to 110 and 292 m<sup>2</sup>·g<sup>-1</sup>, respectively.

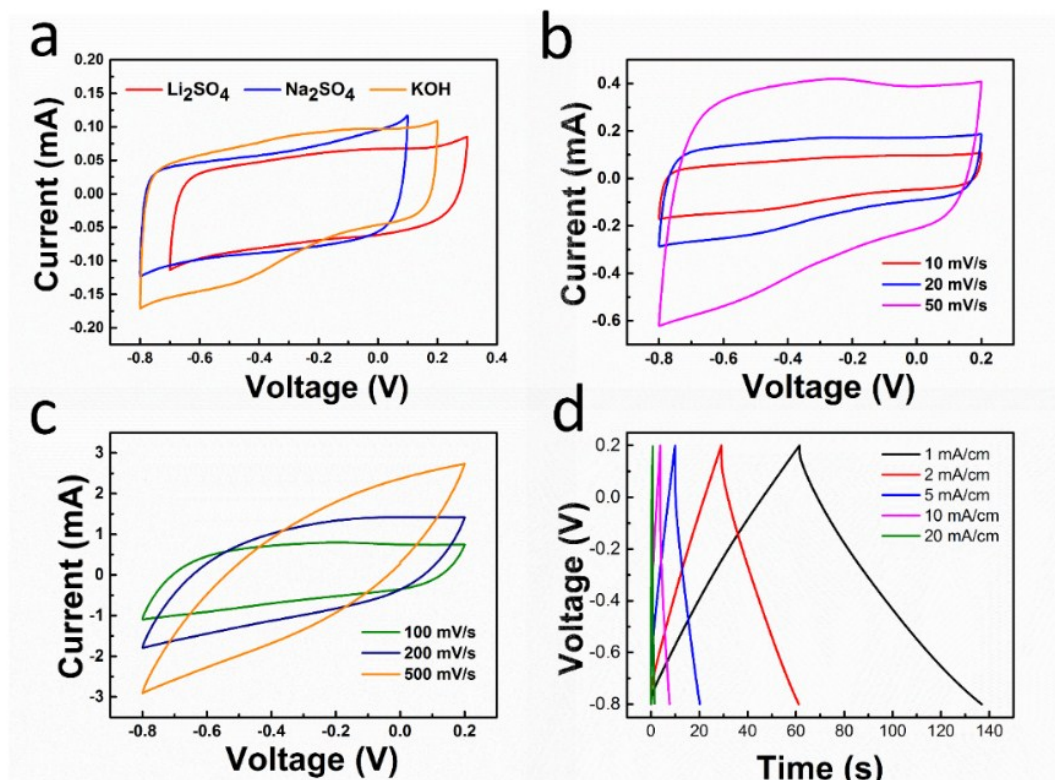

Figure S6. a) CVs of rGM fiber in various electrolytes ( $\text{Li}_2\text{SO}_4$ ,  $\text{Na}_2\text{SO}_4$  and KOH). b-c) CVs of rGMF (length = 1 cm) in 1M KOH at different scan rates from 10 to 500  $\text{mV s}^{-1}$ . d) GCD curves measured at different current densities from 1 to 20  $\text{mA cm}^{-2}$ .



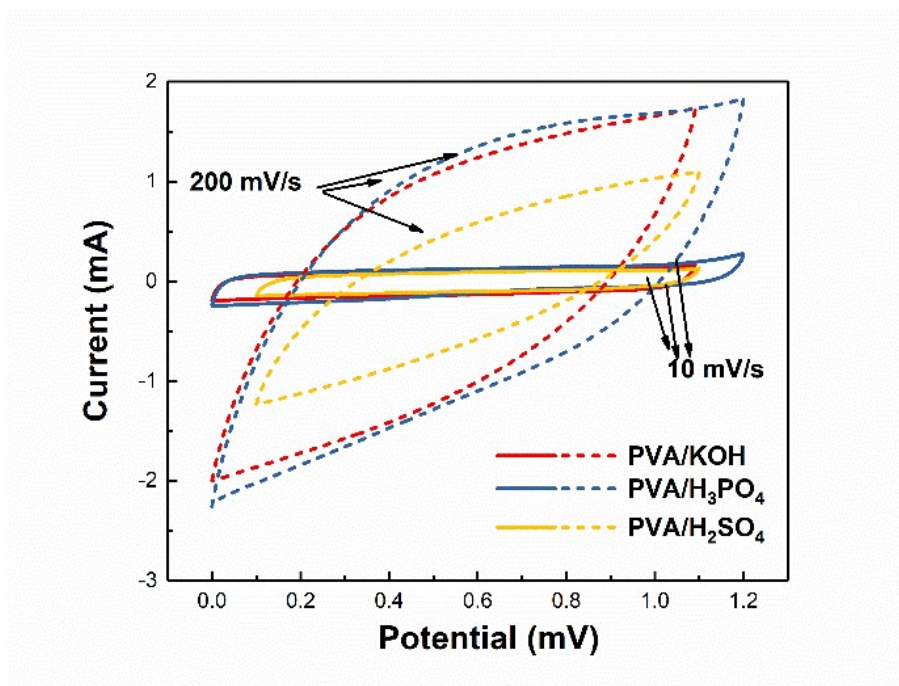

Figure S7. CVs of all-solid-state rGM fibrous supercapacitors assembly with 1 M PVA/KOH, PVA/H<sub>3</sub>PO<sub>4</sub>, and PVA-H<sub>2</sub>SO<sub>4</sub> as electrolyte at with scan rate is 10 and 200 mV·s<sup>-1</sup>, respectively.

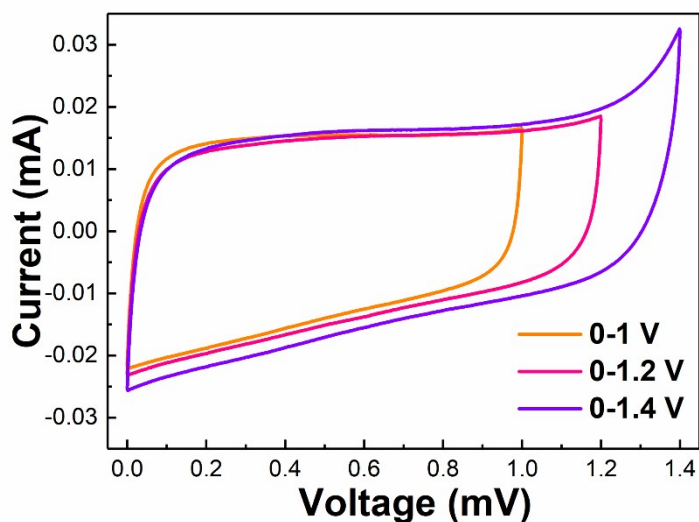

Figure S8. CVs of all-solid-state rGM fibrous supercapacitors assembly with 1 M PVA/KOH, PVA/H<sub>3</sub>PO<sub>4</sub>, and PVA-H<sub>2</sub>SO<sub>4</sub> as electrolyte at with scan rate is 10 and 200 mV·s<sup>-1</sup>, respectively.

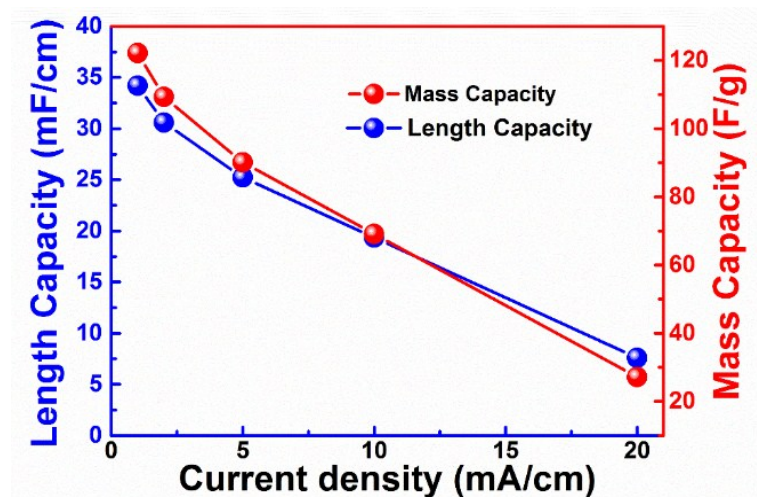

Figure S9. Length and mass capacity as the function of different current density from 1 to 20 mA·cm<sup>-1</sup>.

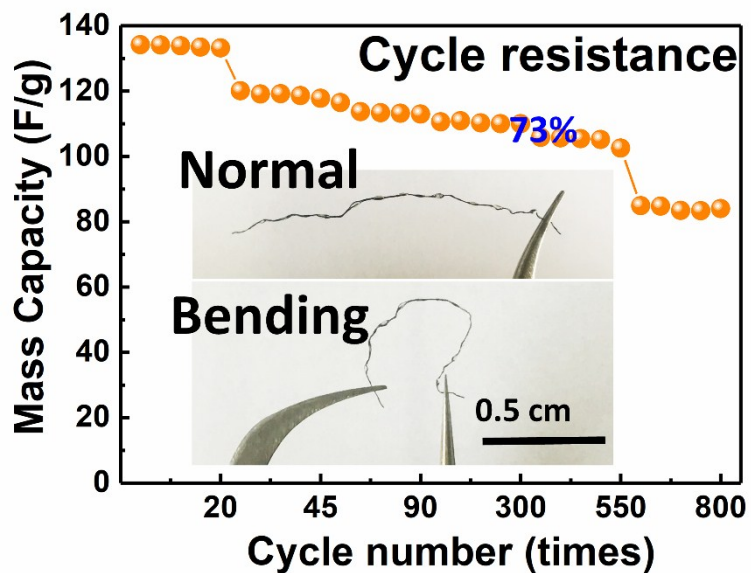

Figure S10. Cycle performance measured at 50 mA for 800 cycles for the two twined ASFS with continuous bending motion.

**Table S1. Comparison of the electrochemical performances of rGM fiber supercapacitors with the other graphene-based fiber-shaped supercapacitors in reference mass capacitance ( $C_m$ ,  $F \cdot g^{-1}$ ), area specific capacitance ( $C_A$ ,  $mF \cdot cm^{-1}$ ), and volume capacitance  $C_v$ ,  $F \cdot cm^{-3}$ ).**

| Materials                                  | Method         | Strength (MPa) | Conductivity (S/cm) | Electrolyte                        | Device's capacitance                                              | Resistance (Cycles) | Bending (Cycles) | Ref |
|--------------------------------------------|----------------|----------------|---------------------|------------------------------------|-------------------------------------------------------------------|---------------------|------------------|-----|
| rGO                                        | Wet-spinning   | 90             | 120                 | PVA/H <sub>3</sub> PO <sub>4</sub> | 208.7 F/g<br>78.3 mF/cm <sup>2</sup><br>3.12 mF/cm                | 99%<br>(4800 C)     | 95%<br>(100 C)   | 18  |
| rGO coaxial                                | Wet-spinning   | 500            | 60                  | PVA/H <sub>2</sub> SO <sub>4</sub> | 205 mF/cm<br>182 F/g                                              | 100%<br>(10000 C)   | 92%<br>(100 C)   | 43  |
| rGO/GO/rGO                                 | Spinning-laser | 150            | -                   | NaClO <sub>4</sub>                 | 2.4 mF/cm <sup>2</sup>                                            | 80%<br>(1000 C)     | ~76%<br>(160 C)  | 21  |
| rGO/SWN T                                  | Plump-thermal  | 84             | 102                 | PVA/H <sub>3</sub> PO <sub>4</sub> | 300 F/cm <sup>3</sup>                                             | ~95%<br>(10000 C)   | -<br>(1000 C)    | 33  |
| rGO/MoS <sub>2</sub> /MWCNT                | CVD            | -              | 150                 | PVA/H <sub>2</sub> SO <sub>4</sub> | 5.2 F/cm <sup>3</sup>                                             | -<br>(7000 C)       | -                | 31  |
| rGO/PEDO T: PSS                            | Wet-spinning   | 631            | 42                  | PVA/H <sub>3</sub> PO <sub>4</sub> | 304.5 mF/cm <sup>2</sup><br>143.3 F/cm <sup>3</sup><br>63.1 F/g   | 96%<br>(10000 C)    | -<br>(500 C)     | 35  |
| rGO@CM C                                   | Wet-spinning   | 116            | 70                  | PVA/H <sub>3</sub> PO <sub>4</sub> | 177mF/cm <sup>2</sup><br>158 F/cm <sup>3</sup>                    | ~100%<br>(2000 C)   | ~98%<br>(200 C)  | 20  |
| rGO/MoO <sub>3</sub> /rGO/MnO <sub>2</sub> | Wet-spinning   | 98             | 16.8                | PVA/H <sub>3</sub> PO <sub>4</sub> | 26.3 F/cm <sup>3</sup>                                            | 96.8%<br>(3000 C)   | NO               | 34  |
| rGO/MoS <sub>2</sub>                       | Wet-spinning   | 175            | -                   | PVA-H <sub>2</sub> SO <sub>4</sub> | 30 F/cm <sup>3</sup>                                              | 78%<br>(1000 C)     | NO               | 23  |
| GF@3D-G                                    | Wet-spinning   | 150            | 44.2                | PVA-H <sub>2</sub> SO <sub>4</sub> | 279 F/g<br>340 F/cm <sup>3</sup>                                  | 92%<br>(1000 C)     | 91%<br>(1000)    | 42  |
| MnO <sub>2</sub> /G/G F                    | Deposition     | -              | -                   | PVA-H <sub>2</sub> SO <sub>4</sub> | 9.1 mF/cm <sup>2</sup><br>34 F/g<br>0.14 mF/cm                    | -                   | -<br>(1000 C)    | 32  |
| rGO/1T-MoS <sub>2</sub>                    | Wet-spinning   | 204.27         | 144                 | PVA/H <sub>3</sub> PO <sub>4</sub> | 134.38 F/g<br>332.9 mF/cm <sup>2</sup><br>221.9 F/cm <sup>3</sup> | 73%<br>(800 C)      | ~70%<br>(500 C)  | Our |
